# Supplementary material for: Preparation of Crosslinked Poly(acrylic acid-co-acrylamide)-Grafted Deproteinized Natural Rubber/Silica Composites as Coating Materials for Controlled Release of Fertilizer
Source: MDPI journal article supplement (doi:10.3390/polym15071770), 2023-04-02
Supplement: s1 [file s1]

# Supplementary Information

## **Preparation of Crosslinked Poly(acrylic acid-*co*-acrylamide)-*Grafted* Deproteinized Natural Rubber/Silica Composites as Coating Materials for Controlled Release of Fertilizer**

**Supharat Inphonlek <sup>1,2</sup>, Kasama Jarukumjorn <sup>1,2</sup>, Pranee Chumsamrong <sup>1,2</sup>, Chaiwat Ruksakulpiwat <sup>1,2,\*</sup> and Yupaporn Ruksakulpiwat <sup>1,2,\*</sup>**

<sup>1</sup> School of Polymer Engineering, Institute of Engineering, Suranaree University of Technology,  
Nakhon Ratchasima 30000, Thailand

<sup>2</sup> Research Center for Biocomposite Materials for Medical Industry and Agricultural and Food Industry,  
Suranaree University of Technology, Nakhon Ratchasima 30000, Thailand

\* Correspondence: charuk@sut.ac.th (C.R.); yupa@sut.ac.th (Y.R.)

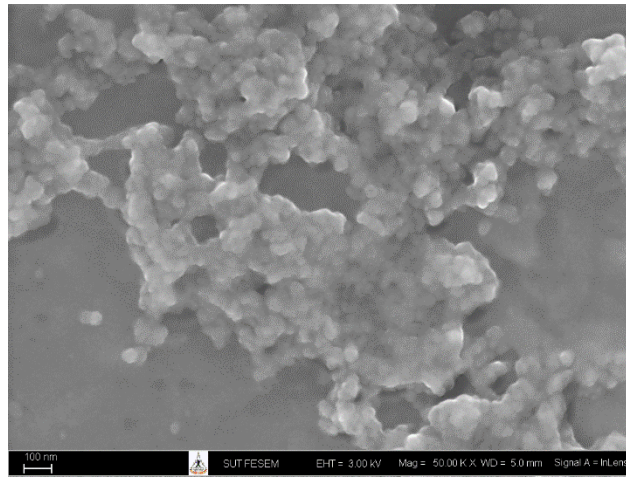

**Figure S1.** SEM image of silica particles.

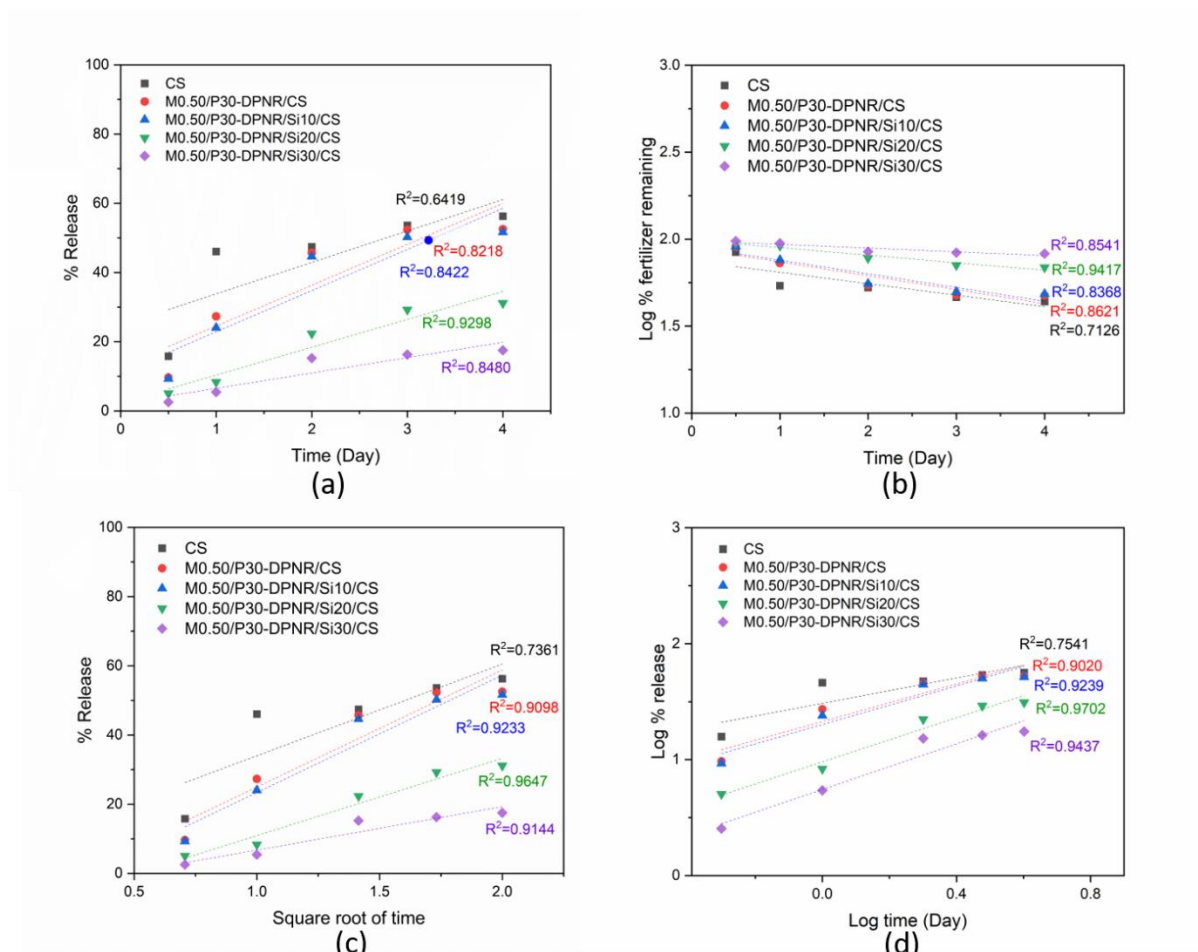

**Figure S2.** Release data fitted to different kinetic models; (a) zero-order, (b) first-order, (c) Higuchi model, and (d) Korsmeyer-Peppas models.
